# Supplementary material for: Outcomes for implementation science: an enhanced systematic review of instruments using evidence-based rating criteria
Source: Implement Sci. 2015 Nov 4;10:155. doi: 10.1186/s13012-015-0342-x (PMC4634818; doi:10.1186/s13012-015-0342-x)
Supplement: Additional file 1: — Search Strings. [file 13012_2015_342_MOESM1_ESM.pdf]

## **Additional File 1: Search Strings and Strategies**

### *Search String Parameters for Implementation Outcomes Framework Literature Review*

---

1. (implement\* OR adopt\* OR "quality improv\*" OR diffus\* OR disseminat\*)

AND

2. ("empirically supported treatment" OR "evidence based practice" OR "evidence based treatment" OR "evidence based intervention" OR innovation OR guideline)

AND

3. ( measure OR instrument OR survey OR questionnaire)

AND

4. ("mental health" OR "behavioral health" OR "behavioural health" OR health)

AND

5. (construct OR synonym)

e.g., (acceptability OR satisfaction OR agreeable);

(adoption OR "knowledge translation" OR uptake OR "intention to adopt");

(appropriateness OR applicability OR compatibility OR "perceived fit" OR fitness OR sustainability);

(feasibility OR transferability OR applicability OR practicability OR workability);

(penetration or "integration of practice" OR infiltration);

(sustain\* OR maintenance OR "long-term implementation" OR routinization OR discontinuation OR "de-adoption" OR durability OR institutionalization OR "capacity building")

---

*Note.* "\*" tells the search engine to return alternate spellings for a word at the point that the asterisk appears.
