# Supplementary material for: Outcomes for implementation science: an enhanced systematic review of instruments using evidence-based rating criteria
Source: Implement Sci. 2015 Nov 4;10:155. doi: 10.1186/s13012-015-0342-x (PMC4634818; doi:10.1186/s13012-015-0342-x)
Supplement: Additional file 2: — Evidence Based Assessment Criteria Guidelines. [file 13012_2015_342_MOESM2_ESM.pdf]

## Additional File 2: Evidence Based Assessment Criteria Guidelines

| Reliability Information |                                                                                                                                                                                                                                                                                                                                                                                                                        |
|-------------------------|------------------------------------------------------------------------------------------------------------------------------------------------------------------------------------------------------------------------------------------------------------------------------------------------------------------------------------------------------------------------------------------------------------------------|
| 0                       | None (N): $\alpha$ values are not yet available OR are only available for subscales.                                                                                                                                                                                                                                                                                                                                   |
| 1                       | Minimal/Emerging (M): $\alpha$ values of $< .60$                                                                                                                                                                                                                                                                                                                                                                       |
| 2                       | Adequate (A): $\alpha$ values of $.60 - .69$                                                                                                                                                                                                                                                                                                                                                                           |
| 3                       | Good (G): $\alpha$ values of $.70 - .79$                                                                                                                                                                                                                                                                                                                                                                               |
| 4                       | Excellent (E): $\alpha$ values of $\geq .80$                                                                                                                                                                                                                                                                                                                                                                           |
| NA                      | Internal Consistency measures are not applicable for this instrument; OR, classical test theory anchors are not appropriate, results reported using item response theory.                                                                                                                                                                                                                                              |
| Structural Validity     |                                                                                                                                                                                                                                                                                                                                                                                                                        |
| 0                       | None (N): No exploratory or confirmatory analysis has yet been performed, nor have any Item Response Theory tests of (uni-) dimensionality have been conducted. OR, percent variance explained is not reported.                                                                                                                                                                                                        |
| 1                       | Minimal/Emerging (M): The sample consisted of less than 5 times the number of items AND an exploratory factor analysis explained less than 25% of the variance.                                                                                                                                                                                                                                                        |
| 2                       | Adequate (A): The sample consisted of 5 times the number of items but is less than 100 in total AND<br>an exploratory factor analysis explained less than 50% of the variance<br>OR<br>a confirmatory factor analysis revealed an RMSEA or SRMR of $= .08$ to $.05$ OR<br>CFI or GFI $= .90$ to $.95$                                                                                                                  |
| 3                       | Good (G): The sample consisted of 5 times the number of items and is greater than or equal to 100 in total OR the sample consisted of 5-7 times the number of items but is less than 100 in total AND in either case<br>an exploratory factor analysis explained less than 50% of the variance<br>OR<br>a confirmatory factor analysis revealed an RMSEA or SRMR of $= .05$ to $.03$ OR<br>CFI or GFI $= .95$ to $.97$ |
| 4                       | Excellent (E): The sample consisted of 7 times the number of items and is greater than 100 in total AND an exploratory factor analysis explained greater than 50% of the variance OR<br>a confirmatory factor analysis revealed an RMSEA or SRMR of $< .03$<br>OR<br>GFI or CFI $> .97$                                                                                                                                |

| <b>Criterion (Predictive) Validity Information</b> |                                                                                                                                                                                                                                                 |
|----------------------------------------------------|-------------------------------------------------------------------------------------------------------------------------------------------------------------------------------------------------------------------------------------------------|
| 0                                                  | None (N): Predictive validity not yet tested or failed to be detected in evaluation.                                                                                                                                                            |
| 1                                                  | Minimal/Emerging (M): Evidence of small correlation (range: 0.1 to 0.29) between instrument and scores on another test (measuring a distinct construct of interest or outcome) administered at some point in the future.                        |
| 2                                                  | Adequate (A): Evidence of medium correlation (range: 0.3 to 0.49) between instrument and scores on another instrument (measuring a distinct construct of interest or outcome) administered at some point in the future.                         |
| 3                                                  | Good (G): Evidence of strong correlation (range: 0.5 to 1.00) between instrument and scores on another instrument (measuring a distinct construct of interest or outcome) administered at some point in the future.                             |
| 4                                                  | Excellent (E): Evidence of medium-strong correlation (0.3 or higher) between instrument and scores on at least two other instruments (measuring a distinct construct of interest or outcome) administered at some point in the future.          |
| <b>Norms</b>                                       |                                                                                                                                                                                                                                                 |
| 0                                                  | None (N): Norms are not yet available.                                                                                                                                                                                                          |
| 1                                                  | Minimal/Emerging (M): Measures of central tendency and distribution for the total score (and subscales if relevant) based only on a small ( $n < 30$ ) sample are available.                                                                    |
| 2                                                  | Adequate (A): Measures of central tendency and distribution for the total score (and subscales if relevant) based on a moderate ( $n = 30-49$ ) sample are available.                                                                           |
| 3                                                  | Good (G): Measures of central tendency and distribution for the total score (and subscales if relevant) based on a medium ( $n = 50-99$ ) sample are available.                                                                                 |
| 4                                                  | Excellent (E): Measures of central tendency and distribution for the total score (and subscales if relevant) based on a large ( $n > 100$ ) sample are available.                                                                               |
| <b>Responsiveness (Sensitivity to Change)</b>      |                                                                                                                                                                                                                                                 |
| 0                                                  | None (N): The instrument has either not been administered both pre- and post-implementation to evaluate sensitivity to change, OR it has been administered and it did not demonstrate responsiveness (change) across an implementation process. |
| 1                                                  | Minimal/Emerging (M): The instrument demonstrated change over time based on a small ( $n < 50$ ) sample.                                                                                                                                        |
| 2                                                  | Adequate (A): The instrument demonstrated EITHER clinically OR statistically significant change over time based on a medium sample ( $n > 50$ but $< 100$ ).                                                                                    |
| 3                                                  | Good (G): The instrument demonstrated change over time reflective of BOTH clinically and statistically significant change based on a large sample ( $n > 100$ ).                                                                                |
| 4                                                  | Excellent (E): The instrument demonstrated BOTH clinically and statistically significant change over time based on at least two large ( $n > 100$ ) samples.                                                                                    |

| <b>Usability (Instrument Length)</b> |                                                                            |
|--------------------------------------|----------------------------------------------------------------------------|
| 0                                    | None (N): The instrument is not in the public domain.                      |
| 1                                    | Minimal (M): The instrument has greater than 100 items.                    |
| 2                                    | Adequate (A): The instrument has greater than 50 items but fewer than 100. |
| 3                                    | Good (G): The instrument has greater than 10 items but fewer than 50.      |
| 4                                    | Excellent (E): The instrument has fewer than 10 items.                     |
